# Supplementary material for: Chaperone Mediated Autophagy is deficient in Spinal Motoneurons of ALS patients with TDP-43 proteinopathy
Source: Research Square preprint supplement (doi:10.21203/rs.3.rs-7444163/v1), 2025-09-10
Supplement: Supplementary file 1 [file 1c0aacbbc875576e6f860dfb.docx]

**Supplementary Table 2.** List of antibodies used for protein detection.

| **Target** | **Host** | **Dilution** | **Reference** |
| --- | --- | --- | --- |
| **Primary antibodies** | | | |
| LAMP2A | Rabbit | 1:500 | Chemicon/AB2034 |
| TDP-43 | Rabbit | 1:50 | Abcam/AB109535 |
| ChAT | Goat | 1:500 | Chemicon/AB144P |
| LC3 | Rabbit | 1:250 | MBL/PM036 |
| GBA | Rabbit | 1:500 | Invitrogen/PAS-21347 |
| CD68 | Mouse | 1:40 | BIO-RAD/MCA1815T |
| GFAP | Chicken | 1:200 | ThermoFisher Scientific PA1-10004 |
| P62 | Rabbit | 1:200 | ThermoFisher Scientific, 600-401-HBB |
| Iba1 | Goat | 1:100 | Abcam/ab5076 |
| **Target** | **Host** | **Dilution** | **Reference** |
| **Secondary antibodies** | | | |
| Rabbit | Goat | 1:200 | Vector/BA-1000 |
| Goat | Rabbit | 1:200 | Vector/BA-5000 |
| Chicken | Goat | 1:200 | Vector/BA-9010 |
| Mouse | Goat | 1:200 | Vector/BA-2020 |
