# Supplementary material for: Chaperone Mediated Autophagy is deficient in Spinal Motoneurons of ALS patients with TDP-43 proteinopathy
Source: Research Square preprint supplement (doi:10.21203/rs.3.rs-7444163/v1), 2025-09-10
Supplement: Supplementary file 2 [file f0894ad8440ef25a578bcecd.docx]

**Supplementary Table 1. Summary of demographic, clinical, and autophagic marker expression data for ALS patients and control subjects.**

| **ALS** | | | | | | | | | |
| --- | --- | --- | --- | --- | --- | --- | --- | --- | --- |
| **ID** | **Age** | **Sex** | **Treatment** | **Disease evolution time** | **LAMP2A** | **LC3** | **GBA** | **P62** | **TDP-43 proteinopathy** |
| 1 | 46 | F | T3-5 intraspinal | 35 months | weak | average | average | negative | strong |
| 3 | 61 | M | T3-5 intraspinal | 20 months | weak | average | average | negative | strong |
| 6 | 54 | F | T3-5 intraspinal | 18 months | weak | average | average | negative | strong |
| 23 | 61 | M | T3-5 intraspinal | 18,5 months | weak | average | average | negative | strong |
| 24 | 70 | F | Intrathecal cells | 20,5 months | weak | average | average | negative | strong |
| 40 | 54 | M | T3-5 intraspinal | 11 months | strong | average | average | some cells | weak |
| 47 | 51 | F | T3-5 intraspinal | 32,5 months | weak | average | average | negative | strong |
| 54 | 65 | F | T3-5 intraspinal | 34 months | weak | average | average | negative | strong |
| 56 | 62 | F | Intrathecal saline | 32 months | weak | average | average | negative | weak |
| 60 | 65 | M | Non-treated | 36 months + 4 y. intubation | weak | average | average | negative | strong |
| **CONTROL** | | | | | | | | | |
| **ID** | **Age** | **Sex** | **Treatment** | **Disease evolution time** | **LAMP2A** | **LC3** | **GBA** | **P62** | **TDP-43 proteinopathy** |
| 1 | 64 | F | - | - | strong | average | average | negative | Absent |
| 2 | 58 | M | - | - | strong | average | average | negative | Absent |
| 3 | 53 | M | - | - | strong | average | average | negative | Absent |
| 4 | 70 | F | - | - | strong | average | average | negative | Absent |
| 5 | 53 | M | - | - | strong | average | average | negative | Absent |
| 6 | 62 | F | - | - | strong | average | average | negative | Absent |

F = Female; M = Male
